# Supplementary material for: High Caloric Density and Optimal Protein-to-Energy Ratio of Oral Nutritional Supplements: Impacts on Catch-Up Growth in Undernourished Indonesian Children
Source: Research Square preprint supplement (doi:10.21203/rs.3.rs-6668470/v1), 2025-07-02
Supplement: Supplementary file 1 [file 9696f3582ca901063a059aa9.pdf]

## SUPPLEMENTARY TABLES

**Supplementary Table 1.** Adequate weight increment

| Age           | Weight Increment |
|---------------|------------------|
| 0 - 3 months  | 30 g /day        |
| 3 - 6 months  | 20 g/day         |
| 6 - 9 months  | 15 g/day         |
| 9 - 12 months | 12 g/day         |
| 1 - 3 years   | 8 g/day          |
| 4 - 5 years   | 6 g/day          |

g, gram

**Supplementary Table 2.** Composition of the Study Products per 100 mL

| Nutrients               | 1.5 kcal/mL | 1.0 kcal/mL |
|-------------------------|-------------|-------------|
| Energy (kcal)           | 150         | 100         |
| Protein (g)             | 3.4         | 2.4         |
| Protein-to-energy ratio | 8.9%        | 9.6%        |
| Carbohydrate (g)        | 18.8        | 14          |
| Lactose (g)             | <0.03       | 2.9         |
| Fat (g)                 | 6.9         | 3.9         |
| Fibre (g)               | -           | 0.66        |
| Osmolarity (mOsm/L)     | 425         | 303         |

mL, milliliter; kcal, kilocalorie; g, gram, mOsm/L, milliosmole per liter.

**Supplementary Table 3.** Effects of intervention on weight gain based on categories of weight-for-age deviations

| <b>Weight gain in the category of underweight (kilogram)</b>        |          |                    |                          |                    |                    |
|---------------------------------------------------------------------|----------|--------------------|--------------------------|--------------------|--------------------|
| <b>Group</b>                                                        | <b>n</b> | <b>Day 14</b>      | <b>Day 30</b>            | <b>Day 60</b>      | <b>Day 90</b>      |
| <b>1.5 kcal/mL</b>                                                  | 24       | 0.26 ± 0.28        | 0.63 ± 0.31              | 0.83 ± 0.34        | 1.06 ± 0.34        |
| <b>1.0 kcal/mL</b>                                                  | 17       | 0.26 ± 0.15        | 0.52 ± 0.29              | 0.85 ± 0.38        | 1.05 ± 0.44        |
| <b>p-value</b>                                                      |          | 0.851 <sup>#</sup> | 0.262 <sup>#</sup>       | 0.863 <sup>#</sup> | 0.987 <sup>#</sup> |
| <b>Weight gain in the category of severe underweight (kilogram)</b> |          |                    |                          |                    |                    |
| <b>Group</b>                                                        | <b>n</b> | <b>Day 14</b>      | <b>Day 30</b>            | <b>Day 60</b>      | <b>Day 90</b>      |
| <b>1.5 kcal/mL</b>                                                  | 13       | 0.36 ± 0.13        | 0.87 ± 0.31              | 1.26 ± 0.46        | 1.52 ± 0.47        |
| <b>1.0 kcal/mL</b>                                                  | 7        | 0.25 ± 0.11        | 0.57 ± 0.21              | 1.02 ± 0.39        | 1.36 ± 0.60        |
| <b>p-value</b>                                                      |          | 0.080 <sup>#</sup> | <b>0.033<sup>#</sup></b> | 0.243 <sup>#</sup> | 0.522 <sup>#</sup> |

Values were presented as mean ± standard deviation.

Weight gain was calculated by subtracting body weight at day 14/30/60/90 with body weight at day 0.

\*, Mann-Whitney U test; #, independent t-test.

p-value <0.05 was highlighted as bold.

kcal/mL, kilocalorie per milliliter.

**Supplementary Table 4.** Effects of intervention on height gain based on height-for-age deviations

| <b>Height gain in the category of stunted (centimeter)</b>          |          |               |                    |                    |                    |
|---------------------------------------------------------------------|----------|---------------|--------------------|--------------------|--------------------|
| <b>Group</b>                                                        | <b>n</b> | <b>Day 14</b> | <b>Day 30</b>      | <b>Day 60</b>      | <b>Day 90</b>      |
| <b>1.5 kcal/mL</b>                                                  | 28       | 0.53 ± 0.41   | 1.75 ± 0.69        | 2.70 ± 0.88        | 3.52 ± 0.86        |
| <b>1.0 kcal/mL</b>                                                  | 16       | 0.56 ± 0.60   | 1.38 ± 0.92        | 2.30 ± 1.00        | 3.19 ± 1.06        |
| <b>p-value</b>                                                      |          | 0.980*        | 0.136 <sup>#</sup> | 0.174 <sup>#</sup> | 0.274 <sup>#</sup> |
| <b>Height gain in the category of severely stunted (centimeter)</b> |          |               |                    |                    |                    |
| <b>Group</b>                                                        | <b>n</b> | <b>Day 14</b> | <b>Day 30</b>      | <b>Day 60</b>      | <b>Day 90</b>      |
| <b>1.5 kcal/mL</b>                                                  | 10       | 0.62 ± 0.23   | 2.01 ± 0.59        | 3.00 ± 0.70        | 3.80 ± 0.85        |
| <b>1.0 kcal/mL</b>                                                  | 10       | 0.55 ± 0.44   | 1.47 ± 0.69        | 2.83 ± 0.57        | 3.65 ± 0.71        |
| <b>p-value</b>                                                      |          | 0.872*        | <b>0.016*</b>      | 0.358*             | 0.673 <sup>#</sup> |

Values were presented as mean ± standard deviation.

Height gain was calculated by subtracting body height at day 14/30/60/90 with body height at day 0.

\*, Mann-Whitney U test; <sup>#</sup>, independent t-test.

p-value <0.05 was highlighted as bold.

kcal/mL, kilocalorie per milliliter.

**Supplementary Table 5.** Effects of intervention on weight gain based on weight-for-height deviations

| <b>Weight gain in the category of wasted (kilogram)</b>          |          |                    |               |               |               |
|------------------------------------------------------------------|----------|--------------------|---------------|---------------|---------------|
| <b>Group</b>                                                     | <b>n</b> | <b>Day 14</b>      | <b>Day 30</b> | <b>Day 60</b> | <b>Day 90</b> |
| <b>1.5 kcal/mL</b>                                               | 18       | 0.35 ± 0.25        | 0.75 ± 0.34   | 1.06 ± 0.49   | 1.28 ± 0.51   |
| <b>1.0 kcal/mL</b>                                               | 9        | 0.26 ± 0.21        | 0.48 ± 0.26   | 0.86 ± 0.31   | 1.13 ± 0.59   |
| <b>p-value</b>                                                   |          | 0.357*             | <b>0.046*</b> | 0.276*        | 0.502*        |
| <b>Weight gain in the category of severely wasted (kilogram)</b> |          |                    |               |               |               |
| <b>Group</b>                                                     | <b>n</b> | <b>Day 14</b>      | <b>Day 30</b> | <b>Day 60</b> | <b>Day 90</b> |
| <b>1.5 kcal/mL</b>                                               | 5        | 0.35 ± 0.08        | 0.90 ± 0.36   | 1.24 ± 0.45   | 1.42 ± 0.41   |
| <b>1.0 kcal/mL</b>                                               | 4        | 0.28 ± 0.07        | 0.64 ± 0.09   | 1.14 ± 0.22   | 1.30 ± 0.23   |
| <b>p-value</b>                                                   |          | 0.215 <sup>#</sup> | 0.191*        | 0.699*        | 0.614*        |

Values were presented as mean ± standard deviation.

Weight gain was calculated by subtracting body weight at day 14/30/60/90 with body weight at day 0.

\*, Mann-Whitney U test; <sup>#</sup>, independent t-test.

p-value <0.05 was highlighted as bold.

kcal/mL, kilocalorie per milliliter.

## SUPPLEMENTARY FIGURE

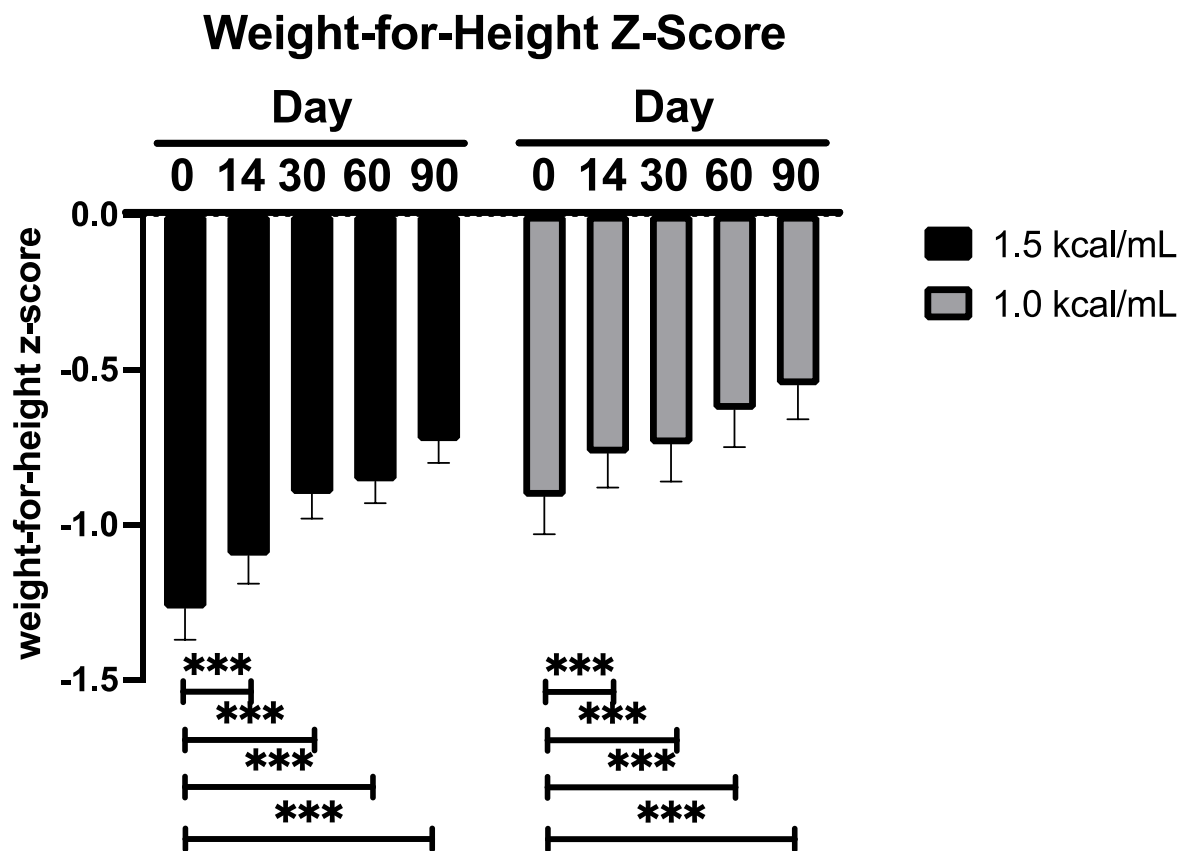

**Supplementary Figure 1.** Assessment of body weight and height upon intervention with ONS products based on weight-for-height z score. Two ONS products, i.e., 1.0 kcal/mL and 1.5 kcal/mL, were provided for study subjects (each group had 75 subjects) for a duration of 90 days. Weight-for-age z scores of both groups were presented as mean  $\pm$  standard error at Day 0, 14, 30, 60 and 90. The statistical analyses were performed between values at Day 0 and each subsequent time point. Asterix sign refers to p-value <0.001.
